# Supplementary material for: 12-hydroxyheptadecatrienoic acid promotes epidermal wound healing by accelerating keratinocyte migration via the BLT2 receptor
Source: PubMed Central journal article supplement — J Exp Med. 2014 Jun 2;211(6):1063–78. doi: 10.1084/jem.20132063 (PMC4042643; doi:10.1084/jem.20132063), 2014-06-02
Supplement: supp_jem.20132063_JEM_20132063_sm.pdf [file supp_jem.20132063_JEM_20132063_sm.pdf]

## SUPPLEMENTAL MATERIAL

Liu et al., <http://www.jem.org/cgi/content/full/jem.20132063/DC1>

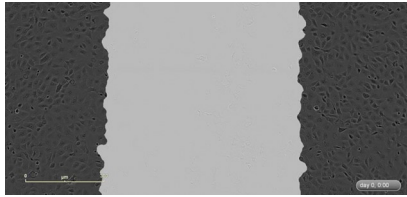

**Video 1.** Time-lapse movies, covering a period of 72 h, show the migration of BLT2 WT mouse primary keratinocytes. The black area represents the initial scratch wound mask, which is designed to identify the borders of the wound region. The movie was acquired in the CO<sub>2</sub> incubator by IncuCyte. Results are representative of three independent experiments.

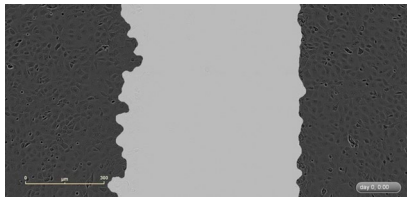

**Video 2.** Time-lapse movies, covering a period of 72 h, show the migration of BLT2 KO mouse primary keratinocytes. The black area represents the initial scratch wound mask, which is designed to identify the borders of the wound region. The movie was acquired in the CO<sub>2</sub> incubator by IncuCyte. Results are representative of three independent experiments.

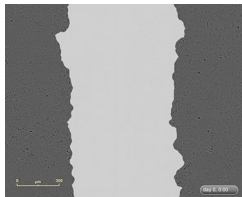

**Video 3.** Time-lapse movies, covering a period of 48 h, show the migration of HaCaT-mock cells cultured in medium containing 0.5% FCS. The black area represents the initial scratch wound mask, which is designed to identify the borders of the wound region. The movie was acquired in the CO<sub>2</sub> incubator by IncuCyte. Results are representative of three independent experiments.

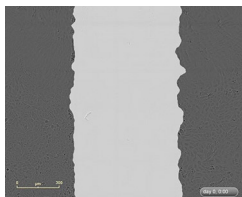

**Video 4.** Time-lapse movies, covering a period of 48 h, show the migration of HaCaT-BLT2 cells cultured in medium containing 0.5% FCS. The black area represents the initial scratch wound mask, which is designed to identify the borders of the wound region. The movie was acquired in the CO<sub>2</sub> incubator by IncuCyte. Results are representative of three independent experiments.
